# Supplementary material for: Salmonella Regulator STM0347 Mediates Flagellar Phase Variation via Hin Invertase
Source: MDPI journal article supplement (doi:10.3390/ijms23158481), 2022-07-30

**Figure S1. LC-MS/MS identification of FliC and FljB. (A and B) Protein sequences of FliC and FljB. (C and D) Intensities of specific peptides of FliC and FljB**

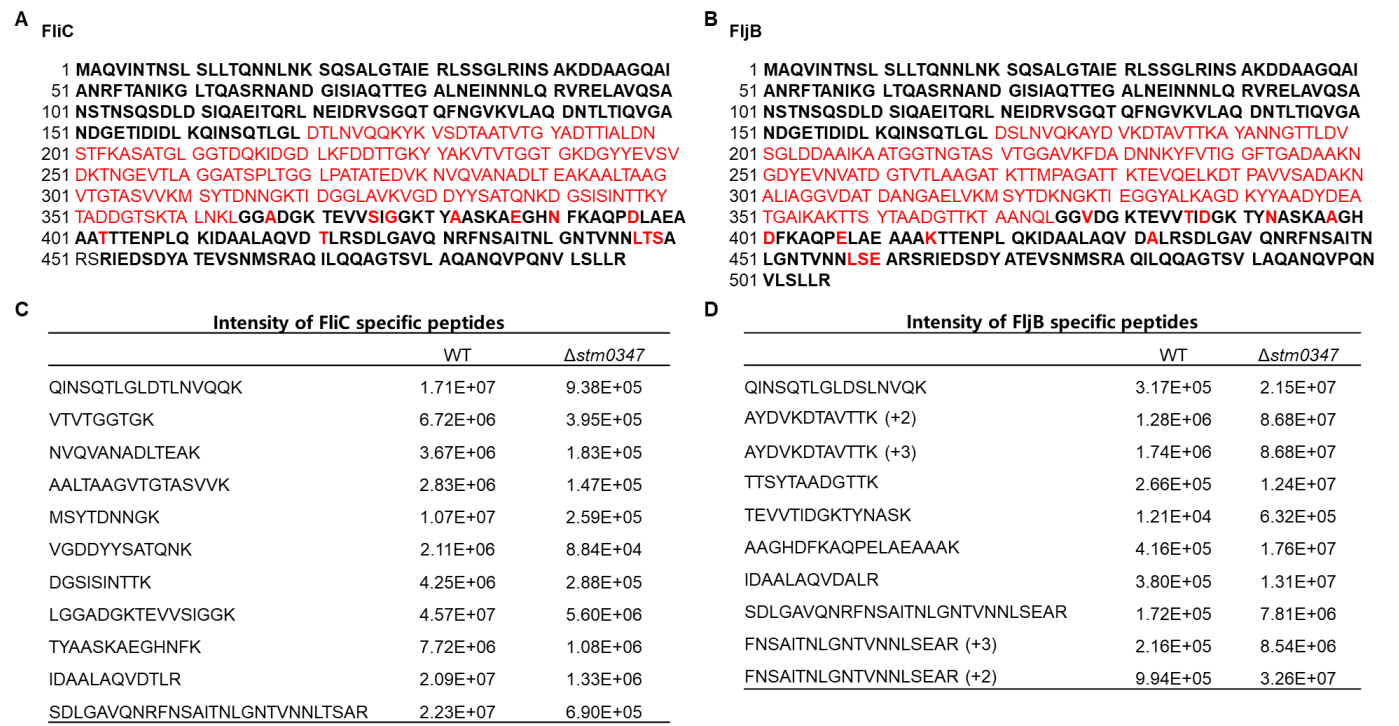

**Figure S2. Swimming motility of WT and  $\Delta stm0347$  strains under different viscosity conditions.** Ficoll were added at the final concentrations of 0, 5 and 10% to the swimming plates. Data were presented as mean  $\pm$  SD. n = 6. Asterisk indicates significant differences ( $*p < 0.05$ ).

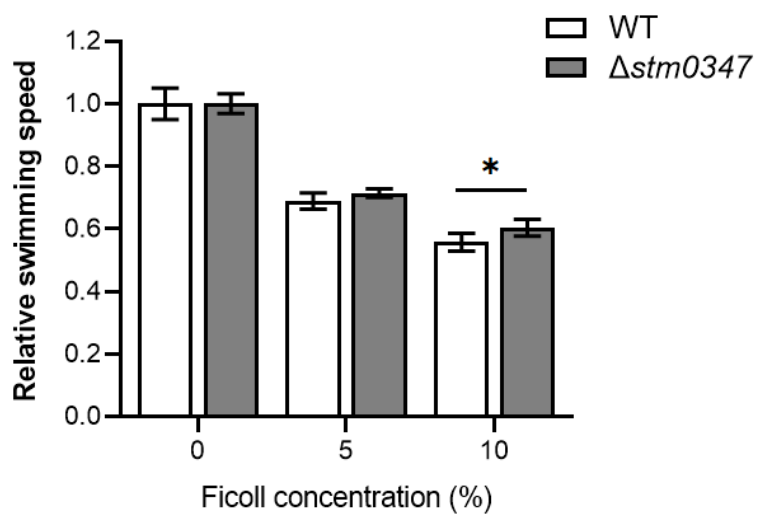

Supplement: s1 [file s1]
